# Supplementary material
Source: PubMed Central journal article supplement (PMC6197491)
Supplement: NIHMS1506069-supplement-1.pdf [file NIHMS1506069-supplement-1.pdf]

**Colour Charges Form – Nature Research Journals****COLOUR FIGURES**

Nature Research Journals are committed to providing authors with the highest quality figures, and we use the latest techniques to achieve this reproduction. We recognise, however, that excessive colour figure and page charges can sometimes place an enormous burden on authors. We therefore charge authors a fee of \$620/£410/€550 for the first colour figure and \$310/£205/€275 per figure for additional colour figures. Authors will be charged in the currency that is most applicable to the corresponding author's address. (Please note that in EU countries VAT will be added if you are unable to provide us with your VAT details below.)

No author will be denied publication based on his/her inability to meet these charges. If we agree that colour is essential but you are unable to meet the costs, they will be waived if you explain the circumstances before your paper is published. Otherwise you will be billed after publication.

**PLEASE COMPLETE AND SIGN THE SECTION BELOW AND RETURN A COPY OF THIS SHEET TO THE EDITORIAL ASSISTANT BY REPLYING TO THE EMAIL, WHERE THE LINK TO THIS FORM CAN BE FOUND. PLEASE NOTE: THERE ARE 2 PAGES TO THE FORM.**

Corresponding Author Name

Brian K. Kobilka

---

Journal

Nature Chemical Biology

---

Manuscript Reference Number:

NCHEMB-A180507671B

---

Contact Name (please note: this will be the person that will process the invoice)

Karen Geiselhart

---

Contact email address (please note: this is where the invoice will be sent)

kgeiselh@stanford.edu

---

Contact Address:

Department: Molecular & Cellular Physiology Institution/Organisation: Stanford University School of Medicine

First line of your address: 279 Campus Drive

Second line of your address: Beckman Center B157

City: Stanford Postal Code: CA94305 Country: United States

Please tick the options that do apply.

- I agree to pay the sum requested in the event that colour is considered essential.
- I am unable to meet the costs of colour for the following reason:

- I am a VAT registered paying member of the EU

If you ticked the VAT box above, you must provide your VAT number below

VAT NUMBER

|  |  |  |  |  |  |  |  |  |  |  |  |  |  |  |  |  |  |  |  |  |
|--|--|--|--|--|--|--|--|--|--|--|--|--|--|--|--|--|--|--|--|--|
|  |  |  |  |  |  |  |  |  |  |  |  |  |  |  |  |  |  |  |  |  |
|--|--|--|--|--|--|--|--|--|--|--|--|--|--|--|--|--|--|--|--|--|

SIGNED: Brian Kobilka

NAME IN BLOCK LETTERS: Brian Kobilka
