# Supplementary material
Source: PubMed Central journal article supplement (PMC6197491)
Supplement: NIHMS1506069-supplement-3.pdf [file NIHMS1506069-supplement-3.pdf]

**Supplementary Table 1. The affinities of Nb80 and Nb71 for HDL-reconstituted  $\beta_2$ AR with different agonists measured by Octet Red.**

|             | <b>Agonist</b> | <b><math>K_{on}</math> (<math>M^{-1}s^{-1}</math>)</b> | <b><math>K_{off}</math> (<math>s^{-1}</math>)</b> | <b><math>K_d</math> (nM)</b> |
|-------------|----------------|--------------------------------------------------------|---------------------------------------------------|------------------------------|
| <b>Nb80</b> | Epinephrine    | $7.2 \times 10^5 \pm 0.1 \times 10^5$                  | $1.6 \times 10^{-3} \pm 0.1 \times 10^{-3}$       | $2.2 \pm 0.1$ (n.s.)         |
|             | BI-167107      | $4.0 \times 10^5 \pm 0.1 \times 10^5$                  | $1.3 \times 10^{-3} \pm 0.1 \times 10^{-3}$       | $3.2 \pm 0.3$ (n.s.)         |
|             | Salmeterol     | $1.8 \times 10^5 \pm 0.1 \times 10^5$                  | $1.6 \times 10^{-3} \pm 0.1 \times 10^{-3}$       | $8.8 \pm 0.7$ (***)          |
| <b>Nb71</b> | Epinephrine    | $2.4 \times 10^5 \pm 0.2 \times 10^5$                  | $2.5 \times 10^{-3} \pm 0.1 \times 10^{-3}$       | $10 \pm 1$ (n.s.)            |
|             | BI-167107      | $3.3 \times 10^5 \pm 0.1 \times 10^5$                  | $2.6 \times 10^{-3} \pm 0.3 \times 10^{-3}$       | $8.0 \pm 0.9$ (n.s.)         |
|             | Salmeterol     | $2.4 \times 10^5 \pm 0.5 \times 10^5$                  | $2.1 \times 10^{-3} \pm 0.1 \times 10^{-3}$       | $8.8 \pm 0.5$ (n.s.)         |

The on- and off-rates ( $K_{on}$  and  $K_{off}$ ) and the  $K_d$  values are listed as mean  $\pm$  SEM from three independent experiments. Analysis of the binding affinities using Ordinary One-way ANOVA (Tukey) test at a multiplicity adjusted P value = 0.05 indicate that the difference in Nb80 affinities between epinephrine and BI-167107 and the differences in Nb71 affinities between epinephrine, BI-167107 and salmeterol bound  $\beta_2$ AR are non-significant (n.s, P values > 0.3), while the difference in Nb80 affinities between epinephrine and salmeterol and BI-167107 and salmeterol are (\*\*\*) , at respective P values of 0.0001 and 0.0003.

**Supplementary Table 2: Data collection and refinement statistics (molecular replacement)**

|                                                                  | <b><math>\beta_2</math>AR-Nb71-Salmeterol*<br/>(PDB code: 6CSY)</b> |
|------------------------------------------------------------------|---------------------------------------------------------------------|
| <b>Data collection</b>                                           |                                                                     |
| Space group                                                      | C2                                                                  |
| Cell dimensions                                                  |                                                                     |
| <i>a, b, c</i> (Å)                                               | 178.68, 52.59, 125.92                                               |
| $\alpha, \beta, \gamma$ (°)                                      | 90, 123.86, 90                                                      |
| Resolution (Å)                                                   | 28.52 – 2.96 (3.07 – 2.96) <sup>a</sup>                             |
| <i>R</i> <sub>merge</sub> (%) <sup>b</sup>                       | 16.7 (52.5)                                                         |
| <  <i>I</i> /σ >                                                 | 7.5 (1.5)                                                           |
| Completeness (%)                                                 | 92.6 (75.1)                                                         |
| Redundancy                                                       | 3.3 (2.0)                                                           |
| <b>Refinement</b>                                                |                                                                     |
| Resolution (Å)                                                   | 28.52 – 2.96 (3.09 – 2.96)                                          |
| No. reflections                                                  | 18742 (1012)                                                        |
| <i>R</i> <sub>work</sub> / <i>R</i> <sub>free</sub> <sup>c</sup> | 20.9 (29.8) / 24.6 (33.2)                                           |
| Number of atoms                                                  |                                                                     |
| Protein                                                          | 4560                                                                |
| Ligand/ion                                                       | 111                                                                 |
| Water                                                            | 20                                                                  |
| Average B factors (Å <sup>2</sup> )                              |                                                                     |
| $\beta_2$ AR                                                     | 47.2                                                                |
| T4L                                                              | 61.5                                                                |
| Nb71                                                             | 50.6                                                                |
| Salmeterol                                                       | 36.4                                                                |
| Water                                                            | 36.3                                                                |
| R.m.s. deviations                                                |                                                                     |
| Bond lengths (Å)                                                 | 0.007                                                               |
| Bond angles (°)                                                  | 0.8                                                                 |

\*X-ray diffraction data from 24 LCP crystals was merged to get the final complete data set.

<sup>a</sup>Values in parentheses are for highest-resolution shell.

<sup>b</sup> $R_{\text{merge}} = \sum |I_i - I_m| / \sum I_i$ , where  $I_i$  is the intensity of the measured reflection and  $I_m$  is the mean intensity of all symmetry related reflections.

<sup>c</sup> $R_{\text{cryst}} = \sum ||F_{\text{obs}}| - |F_{\text{calc}}|| / \sum |F_{\text{obs}}|$ , where  $F_{\text{obs}}$  and  $F_{\text{calc}}$  are observed and calculated structure factors.

$R_{\text{free}} = \sum_T ||F_{\text{obs}}| - |F_{\text{calc}}|| / \sum_T |F_{\text{obs}}|$ , where T is a test data set of about 5% of the total reflections randomly chosen and set aside prior to refinement.

**Supplementary Table 3. E<sub>max</sub> and pEC50 values for BRET-based  $\beta$ arrestin-2 recruitment and Gs activation assays in cells from Figure 4. NR = not reported**

|              | $\beta$ arr-2 recruitment (ISO) |            | $\beta$ arr-2 recruitment (SALM) |            | Gs activation (ISO) |            | Gs activation (SALM) |            |
|--------------|---------------------------------|------------|----------------------------------|------------|---------------------|------------|----------------------|------------|
|              | E <sub>max</sub>                | pEC50      | E <sub>max</sub>                 | pEC50      | E <sub>max</sub>    | pEC50      | E <sub>max</sub>     | pEC50      |
| <b>WT</b>    | 100 ± 1                         | -7.1 ± 0.1 | NR                               | NR         | 99 ± 5              | -6.8 ± 0.1 | 84 ± 7               | -8.4 ± 0.3 |
| <b>N293Q</b> | 13 ± 1                          | -5.4 ± 0.1 | NR                               | NR         | 80 ± 9              | -5.6 ± 0.2 | 82 ± 6               | -8.9 ± 0.3 |
| <b>N293D</b> | 11 ± 2                          | -5.4 ± 0.2 | NR                               | NR         | 75 ± 7              | -6.0 ± 0.2 | 85 ± 7               | -8.4 ± 0.3 |
| <b>N293A</b> | 61 ± 1                          | -6.0 ± 0.1 | 17 ± 1                           | -8.3 ± 0.1 | 86 ± 6              | -6.2 ± 0.2 | 91 ± 6               | -8.7 ± 0.3 |
| <b>S204T</b> | 4 ± 2                           | -5.5 ± 0.8 | NR                               | NR         | 76 ± 10             | -5.5 ± 0.3 | 44 ± 7               | -8.1 ± 0.6 |
| <b>S204A</b> | 40 ± 4                          | -5.2 ± 0.1 | NR                               | NR         | 93 ± 8              | -5.8 ± 0.2 | 71 ± 7               | -8.3 ± 0.4 |

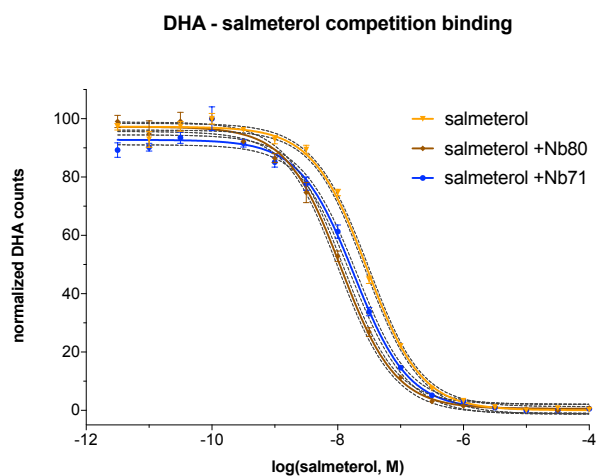

$K_i$  salm (nM) = 13; 95%CI [12,14]  
 $K_i$  salm +Nb71 (nM) = 5.0; 95%CI [4.4,5.7]  
 $K_i$  salm +Nb80 (nM) = 8.1; 95%CI [7.0,9.3]

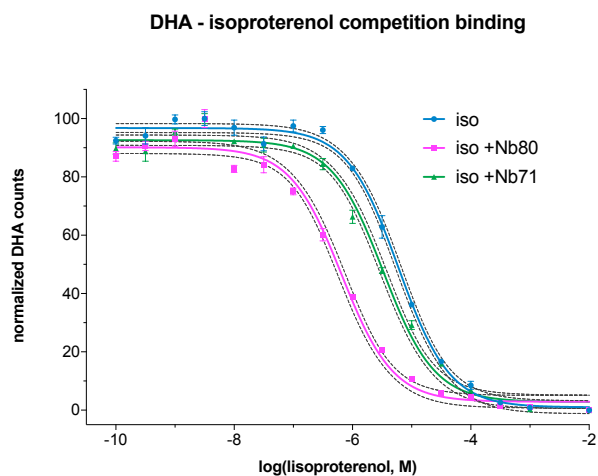

$K_i$  iso ( $\mu$ M) = 2.7; 95%CI [2.3,3.1]  
 $K_i$  iso +Nb71 ( $\mu$ M) = 1.5; 95%CI [1.2,1.8]  
 $K_i$  iso +Nb80 ( $\mu$ M) = 0.29; 95%CI [0.24,0.35]

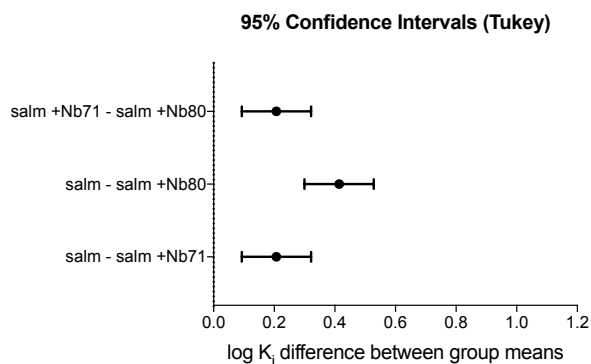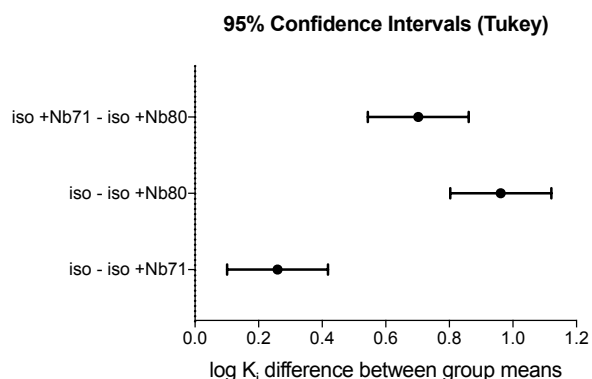

**Supplementary Figure 1. Salmeterol and isoproterenol competition binding on purified  $\beta_2$ AR in detergent, in the presence of Nb71 and Nb80.** Purified  $\beta_2$ AR (1nM) in detergent buffer was incubated for 1h at room temperature in the presence of 5nM [ $^3$ H]dihydroalprenolol and, when indicated, 2 $\mu$ M Nb71 or Nb80, in the presence of increasing concentrations of salmeterol (left panel) or isoproterenol (right panel). Data points for the competition binding curves are presented as mean values  $\pm$  SEM from three independent measurements. The data were analyzed in Prism (GraphPad) using “Nonlinear Regression – One site – Fit  $K_i$ ” fitting, with the fitted curve shown in color and 95% confidence intervals plotted as dashed black lines for each fit (top plots).  $K_i$  values are reported as means with 95% confidence intervals in square brackets. To assess whether the difference between the calculated log $K_i$  values was statistically significant, a one-way ANOVA Tukey test was performed to compare the fitted mean log $K_i$  values. As shown in the bottom plots, all differences are statistically significant at P values of 0.05 (adjusted for multiple comparisons), although the 95% confidence intervals clearly indicate that the log $K_i$  difference  $\pm$  Nb is larger and more significant for Nb80 than for Nb71.

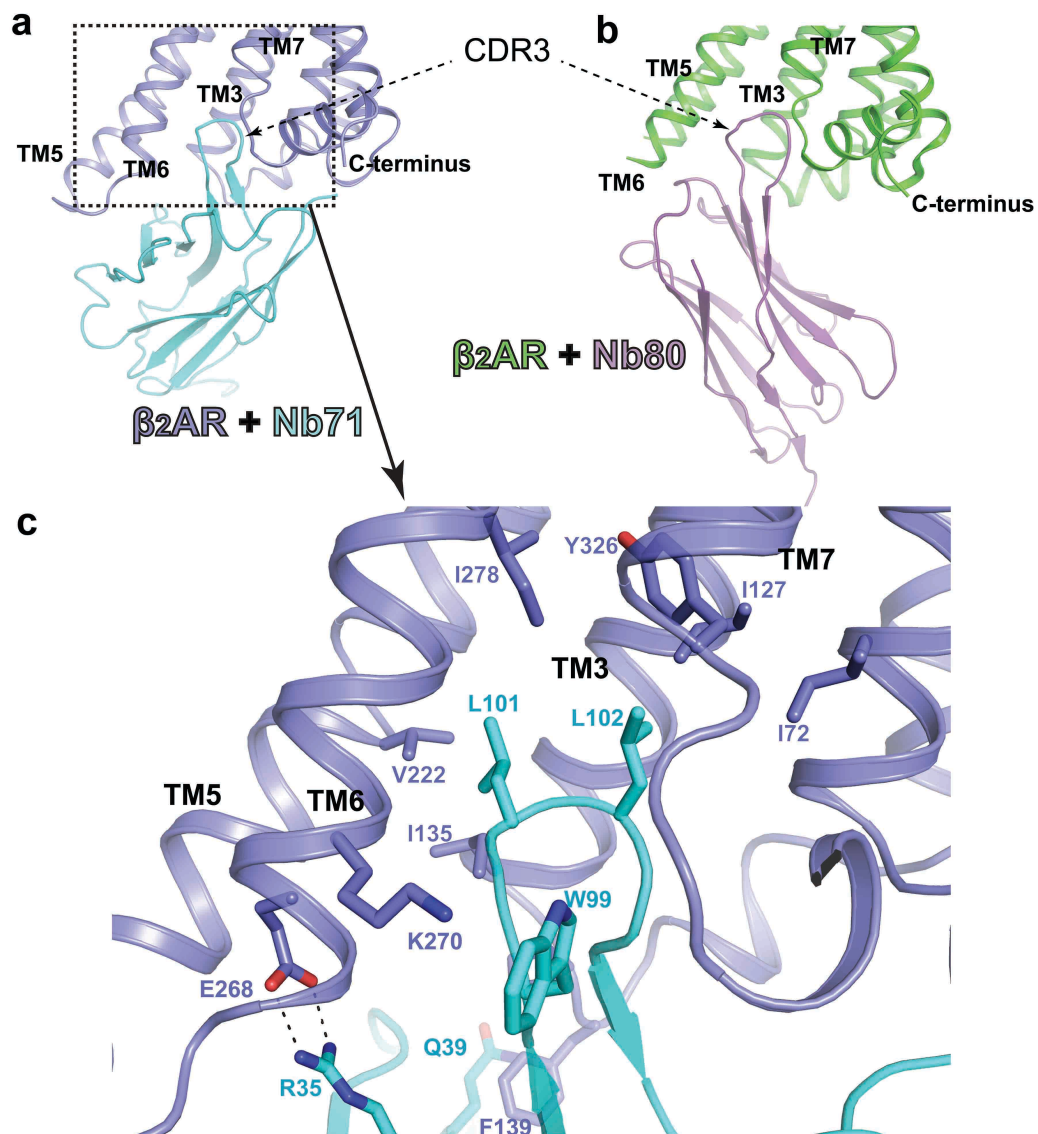

**Supplementary Figure 2. Different modes of Nb71 and Nb80 binding to the  $\beta_2$ AR.** (a)  $\beta_2$ AR with Nb71. (b)  $\beta_2$ AR with Nb80. (c) Interactions between  $\beta_2$ AR and Nb71. Two residues L101 and L102 in the Nb71 CDR3 insert into a hydrophobic cavity at the cytoplasmic region of  $\beta_2$ AR to form extensive hydrophobic interactions with residues I278, Y326, I127, V222, I135 and I72. Additional salt bridge interaction between E268 in  $\beta_2$ AR and R35 in Nb71 and cation- $\pi$  interaction between K270 in  $\beta_2$ AR and W99 in Nb71 also contribute to the binding of Nb71.

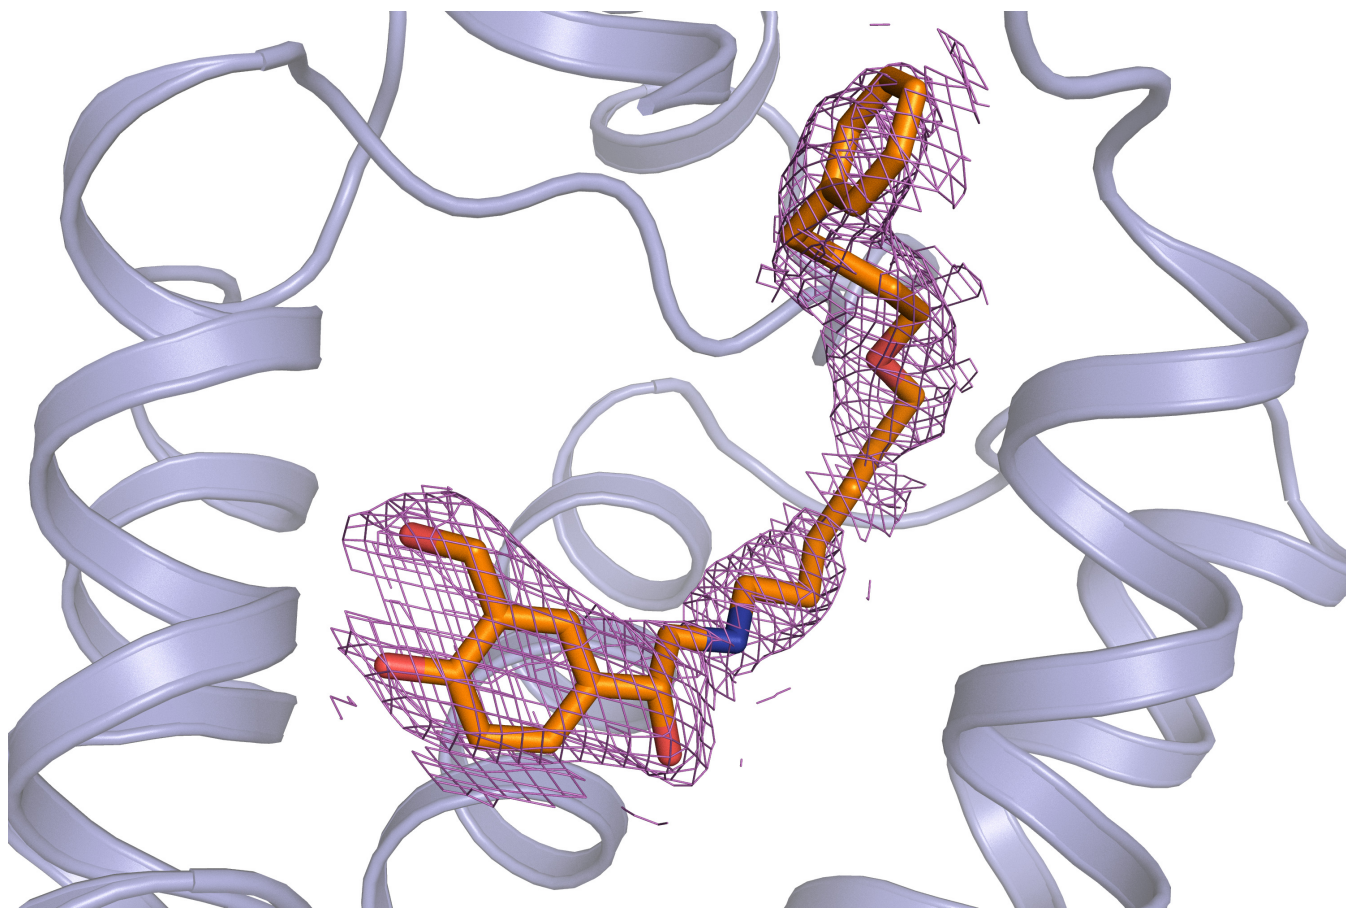

**Supplementary Figure 3. Composite omit electron density map of salmeterol.**  $\beta_2$ AR is colored blue. Salmeterol is colored orange. The  $2F_o - F_c$  composite omit electron density map of salmeterol is shown as purple mesh contoured at  $1.2\sigma$ .



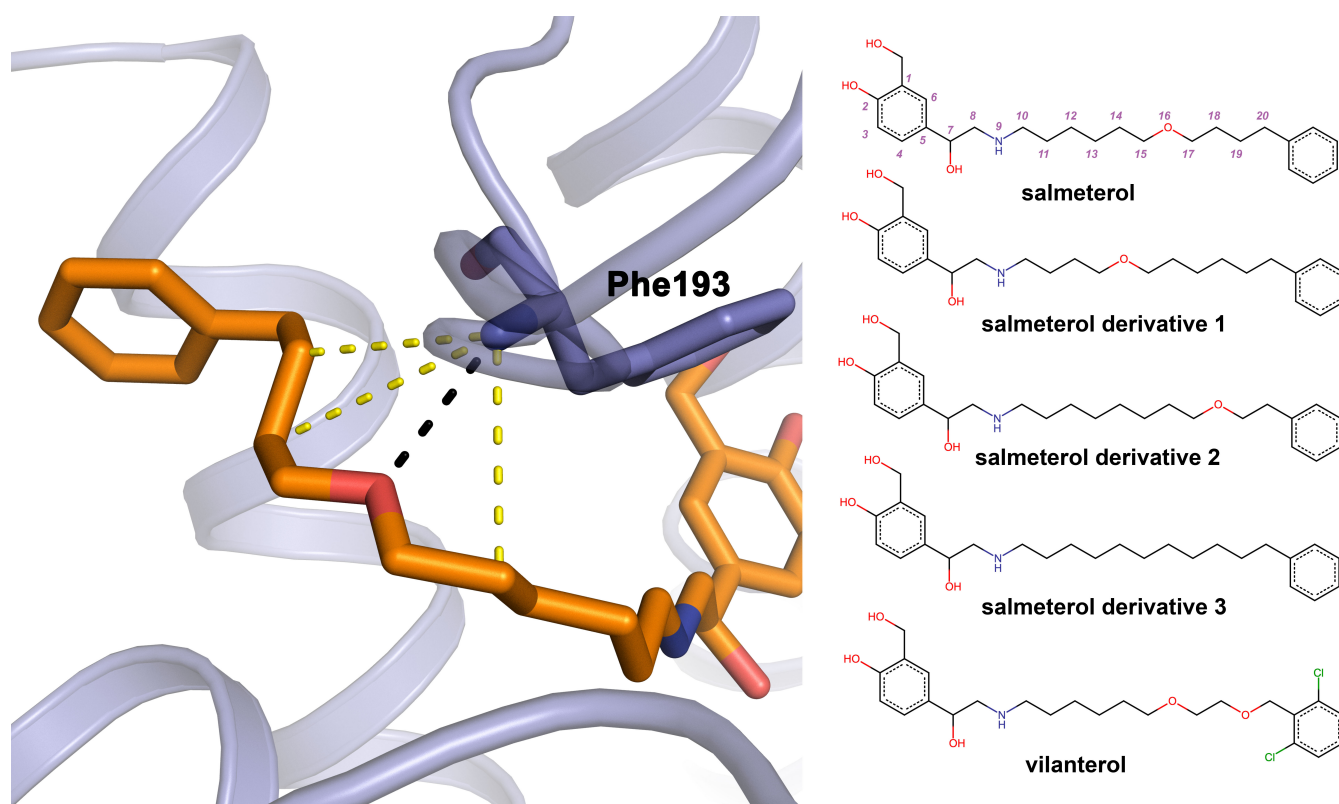

**Supplementary Figure 5. Important role of the ether oxygen in salmeterol.** The ether oxygen at position 16 in salmeterol forms a hydrogen bond with the main chain amine of residue Phe193 (black dashed line). Changing the position of the ether oxygen to positions 14 (salmeterol derivative 1) or position 18 (salmeterol derivative 2) greatly reduces the ligand affinities, and removing this oxygen (salmeterol derivative 3) reduces the affinity even further<sup>2</sup>. This is most likely due to the loss of the hydrogen bond, since the distance between the main chain amine of Phe193 and the atom at position 14 or 18 in salmeterol (represented by yellow dashed lines) is longer than 3.5Å. On the other hand, another long-lasting  $\beta_2$ AR agonist vilanterol, which shares a high structural similarity with salmeterol but has one more ether oxygen atom at position 19 that may form an additional hydrogen bond, exhibits higher affinity and longer *in vivo* duration of action compared to salmeterol<sup>3</sup>.

- 2 Isogaya, M. *et al.* Identification of a key amino acid of the beta2-adrenergic receptor for high affinity binding of salmeterol. *Mol Pharmacol* **54**, 616-622 (1998).
- 3 Slack, R. J. *et al.* In vitro pharmacological characterization of vilanterol, a novel long-acting beta2-adrenoceptor agonist with 24-hour duration of action. *J Pharmacol Exp Ther* **344**, 218-230 (2013).



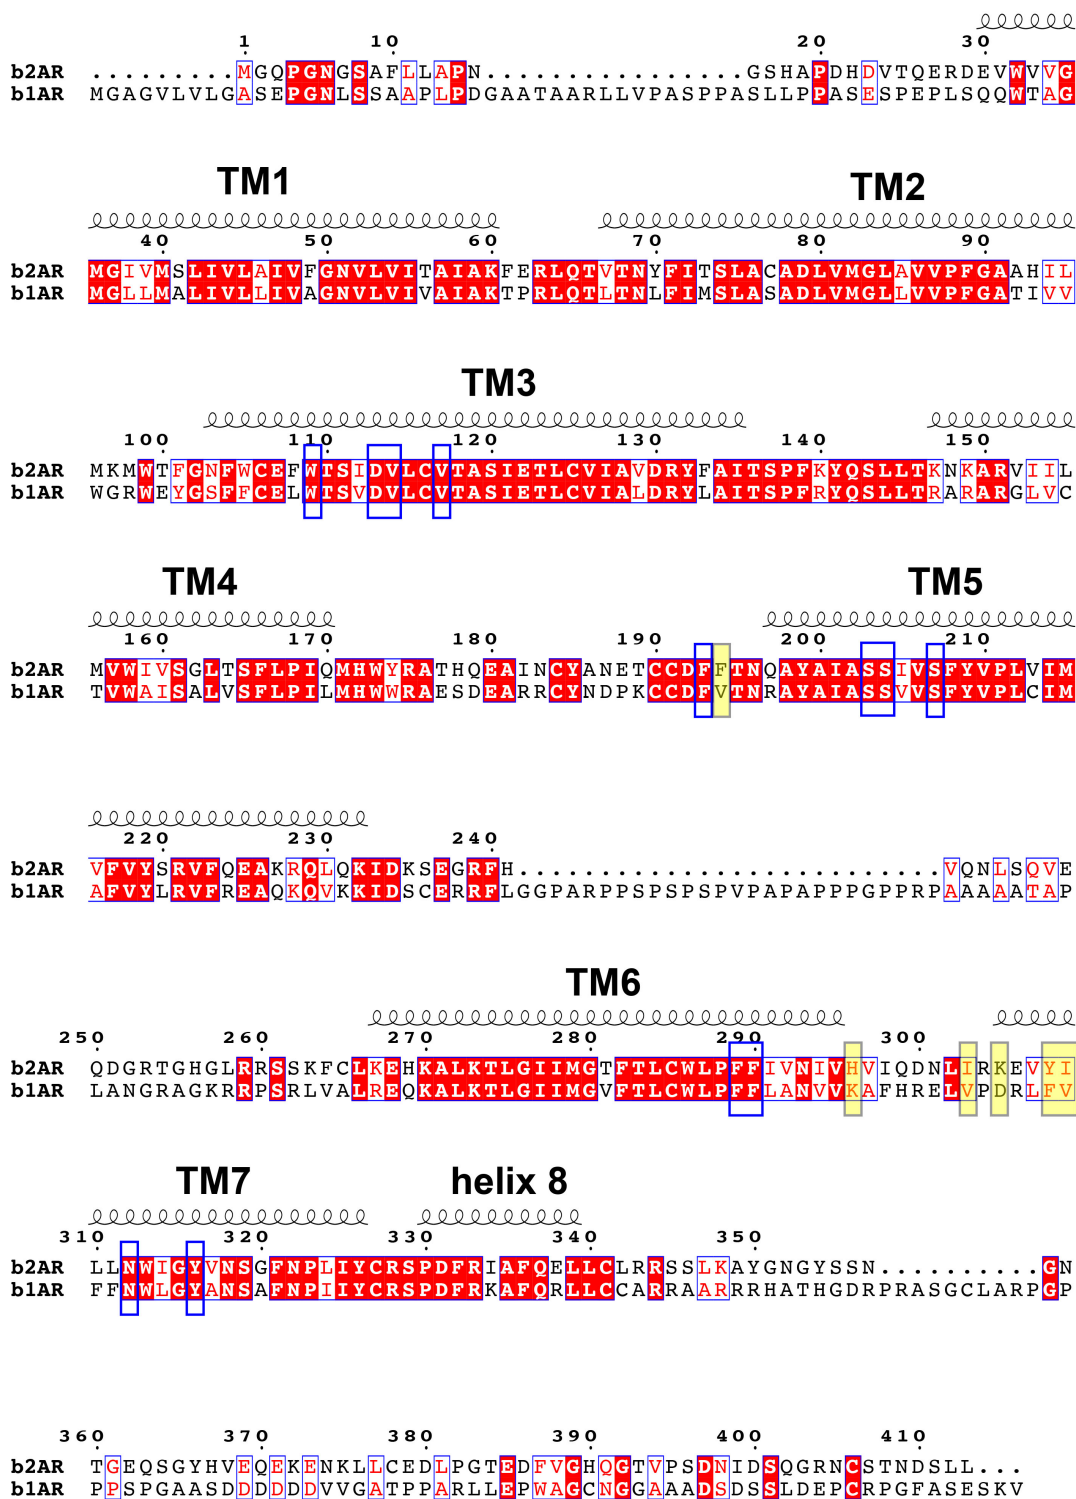

**Supplementary Figure 6. Sequence alignment of human  $\beta_2$ AR (b2AR) and  $\beta_1$ AR (b1AR).** The seven transmembrane helices in the human  $\beta_2$ AR-salmeterol structure are shown above the sequences. The residues of  $\beta_2$ AR that interact with the head group of salmeterol in the orthosteric-binding pocket are indicated by dark blue boxes, which are highly conserved in  $\beta_2$ AR and  $\beta_1$ AR. The yellow boxes highlight residues of  $\beta_2$ AR in the exosite that interact with the tail of salmeterol, which are far less conserved.

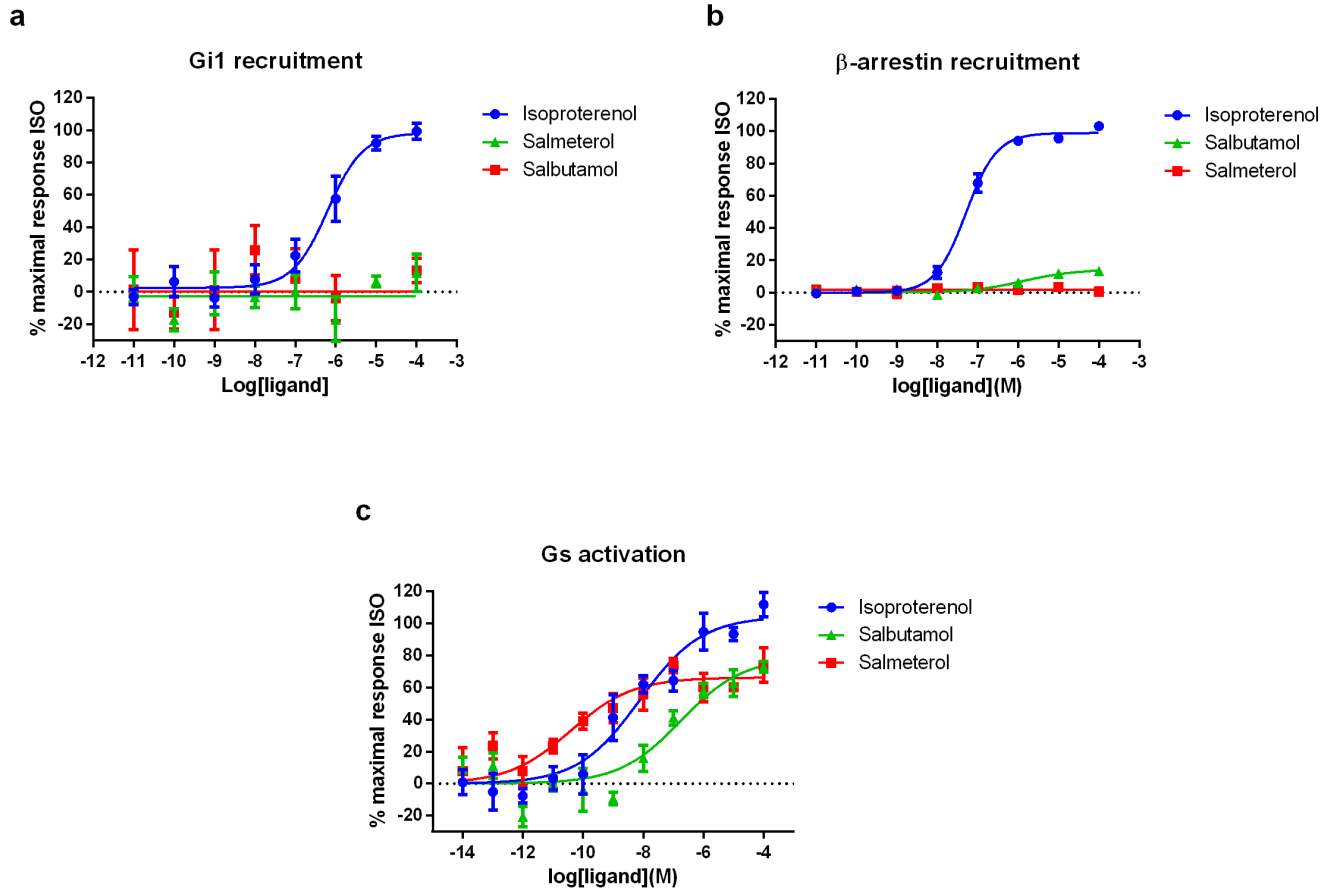

**Supplementary Figure 7. (a)** Dose-response curves of  $\beta_2$ AR full agonist isoproterenol (ISO) and partial agonists salmeterol (SALM) and salbutamol (SALB) on cell-based BRET measurements between  $G\alpha_i$ -91-RLuc and nic/myc-  $\beta_2$ AR-GFP10. Isoproterenol and salmeterol increased the interaction between  $G\alpha_i$ -91-RLuc and nic/myc-  $\beta_2$ AR-GFP10 in a concentration-dependent manner (pEC<sub>50</sub> for isoproterenol =  $-6.2 \pm 0.2$ ) Salbutamol and Salmeterol had no effect in this assay. Data are the mean  $\pm$  SEM of 3 independent experiments performed in duplicates. **(b)** Dose-response curves of isoproterenol, salmeterol and salbutamol on cell-based BRET measurements between  $\beta$ -arrestin 2-RLucII and rGFP-CAAX. Isoproterenol and Salmeterol increased the recruitment of  $\beta$ -arrestin 2-RLucII to the rGFP-CAAX in a dose-dependent manner (pEC<sub>50</sub> for isoproterenol =  $-7.3 \pm 0.04$ ; pEC<sub>50</sub> for salbutamol =  $-5.9 \pm 0.5$ , n=4). Data are the mean  $\pm$  SEM of four experiments with repeats in duplicates. **(c)** Dose-response curves of isoproterenol, salbutamol and salmeterol on cell-based BRET measurements between  $G\alpha_s$ -117-RLuc and  $G\gamma_1$ -GFP10. 5min stimulation with isoproterenol, salbutamol or salmeterol decreased the BRET signal between  $G\alpha_s$ -117-RLucII and  $G\gamma_1$ -GFP10 in a concentration dependent manner (pEC<sub>50</sub> for isoproterenol =  $-8.1 \pm 0.3$ , pEC<sub>50</sub> for salbutamol =  $-6.7 \pm 0.5$  and for salmeterol =  $-10 \pm 0.4$ ). Data are the mean  $\pm$  SEM of 3 independent experiments performed in duplicates. Error bars shorter than the height of the symbol are not shown.

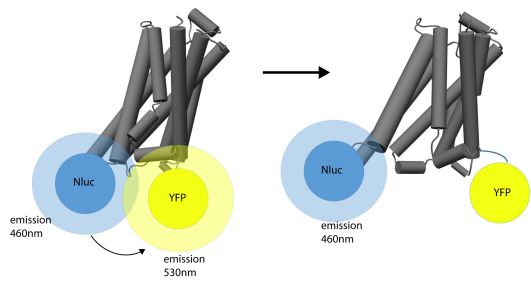

|      | eMAX    | pEC50      |
|------|---------|------------|
| ISO  | 100 ± 4 | -7.4 ± 0.1 |
| EPI  | 110 ± 6 | -6.6 ± 0.1 |
| SALB | NR      | NR         |
| SALM | NR      | NR         |

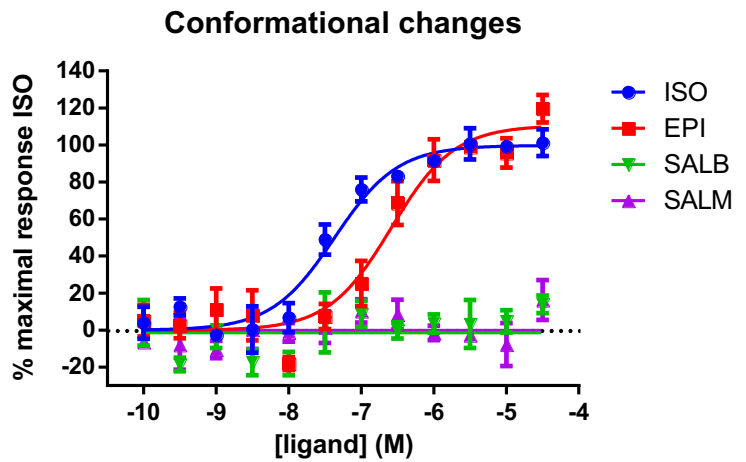

**Supplementary Figure 8. The  $\beta_2$ AR conformational sensor in live cells shows distinct ligand responses.** Full and unbiased agonists induce strong conformational changes on the  $\beta_2$ AR in live cells, whereas partial and biased agonists do not induce detectable conformational changes, suggesting that the 2 types of ligand stabilize different conformations of the receptor. Data represent the mean  $\pm$  SEM of 3 independent experiments. NR = not reported

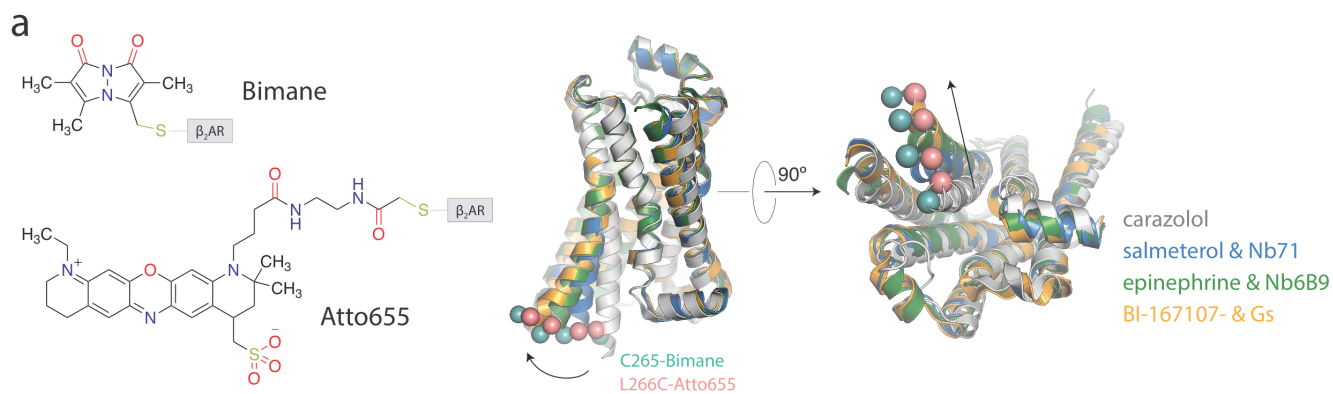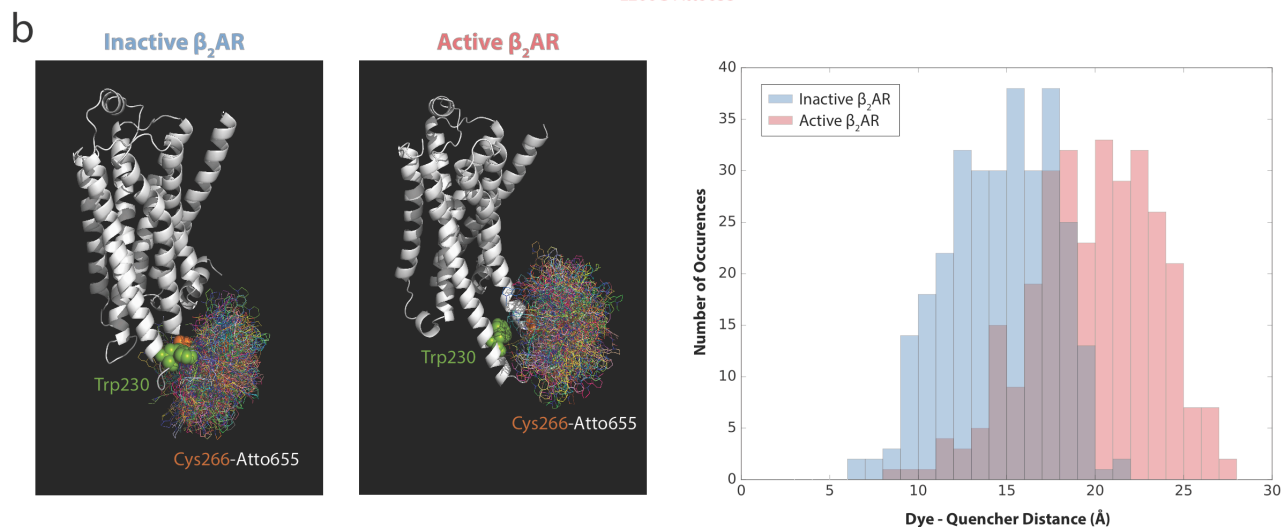

**Supplementary Figure 9. Fluorescent reporters of  $\beta_2AR$  activation.** (a) Chemical structures of the  $\beta_2AR$ -conjugated fluorophores used in spectroscopic studies of receptor activation (left panel), and overlay of carazolol-bound (grey), salmeterol-bound (blue), epinephrine-bound (green) and BI-167107-bound (yellow)  $\beta_2AR$  crystal structures (right panel). The side view and cytoplasmic view show the outward TM6 motion upon activation, as indicated by black arrows. The labeling sites for bimane and Atto655 are shown as spheres, colored green and pink, respectively. (b) Simulating the ensembles of Atto655 bound to Cys 266 in the inactive (antagonist-bound structure, PDB ID 2RH1) and active (agonist- and Gs-bound structure, PDB ID 3SN6)  $\beta_2AR$  structures (left panel), yields an average Atto655 -Trp 230 (Dye-Quencher) distance change of about 5 Å upon receptor activation (right panel), compatible with the reported threshold quenching distance.

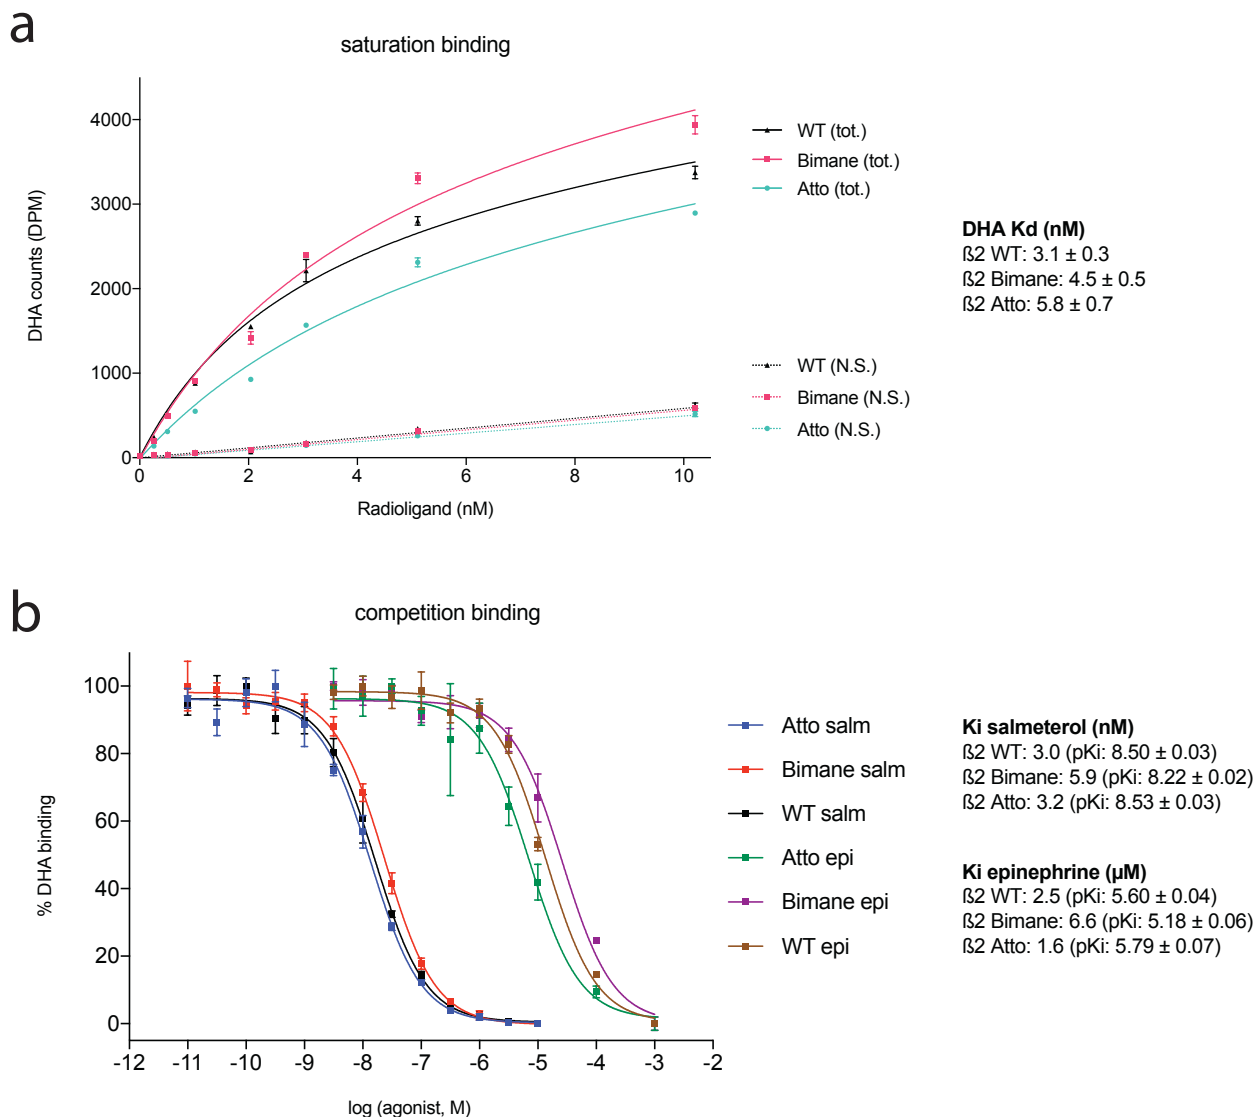

**Supplementary Figure 10. Radioligand binding on purified wild-type, bimane-labeled and Atto655-labeled  $\beta_2$ AR in detergent.** The engineered  $\beta_2$ AR constructs labeled with bimane ( $\beta_2$  Bimane) or Atto655 ( $\beta_2$  Atto) show similar ligand binding properties as the wild type  $\beta_2$ AR ( $\beta_2$  WT). **(a)** [ $^3$ H]-dihydroalprenolol (DHA) saturation binding assays, total binding (tot.), non-specific binding (N.S.). Purified  $\beta_2$ AR (1nM) in detergent buffer was incubated for 1h at room temperature in the presence of increasing amounts of DHA. **(b)** Salmeterol and epinephrine competition binding assays. Purified  $\beta_2$ AR in detergent buffer (1nM) was incubated for 1h at room temperature in the presence of 5nM DHA and in the presence of increasing concentrations of salmeterol or epinephrine. Data points are presented as mean values  $\pm$  SD from 3 independent measurements. The data was analyzed in Prism (GraphPad).

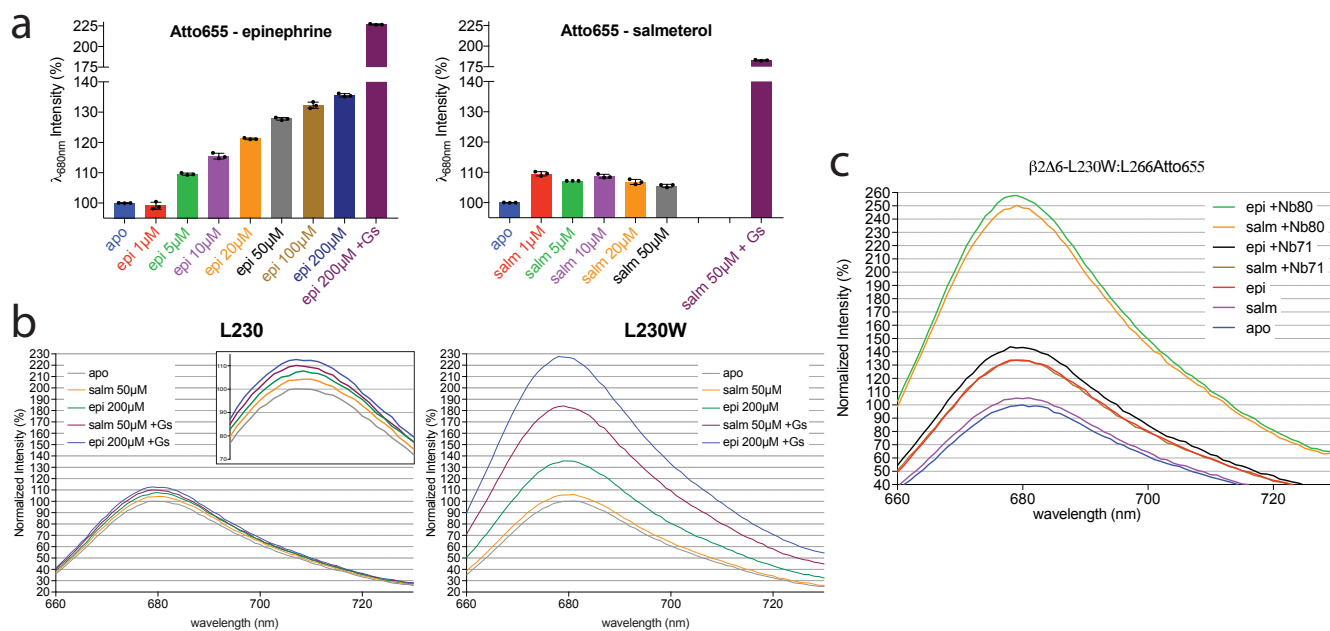

**Supplementary Figure 11. a)** Dose-response of the fluorescence of Atto655-labeled  $\beta_2$ AR in detergent, in the presence of epinephrine and salmeterol. The intensity changes at 680nm for the emission spectra presented in **Fig. 5d** are calculated relative to the unliganded response (apo, 100%). The Atto-labeled  $\beta_2$ AR shows a dose-dependent increase in Atto655 fluorescence intensity in the presence of epinephrine, indicating a conformational change upon binding sufficient to partly unquench the Atto fluorescence. Little change is observed in the presence of increasing amounts of salmeterol, suggesting that the receptor conformational changes associated with salmeterol binding are not sufficient to substantially alter Atto quenching. Bar graphs represent the mean  $\pm$  S.D. (error bars) of triplicate measurements (data points shown as black dots). **b)** Emission spectra of Atto655-labeled  $\beta_2$ AR $\Delta$ 6-L266C with and without the L230W mutation in detergent. The minor fluorescence intensity changes observed on Atto-labeled  $\beta_2$ AR with the native Leu230 compared to  $\beta_2$ AR with the L230W mutation indicate that the engineered tryptophan is responsible for the observed quenching/unquenching of Atto655 at residues L266C. The spectra are normalized to the respective unliganded data (apo, grey curve). **c)** Atto- $\beta_2$ AR response in the presence of Nb71 and Nb80. Fluorescence emission spectra of Atto655-labeled  $\beta_2$ AR $\Delta$ 6 L230W:L266C in detergent, in the presence of saturating concentrations of epinephrine or salmeterol, with and without Nb71 or Nb80. For both ligands the Atto response in the presence of Nb80 is much larger than in the presence of Nb71. Nb71 in the presence of epinephrine or salmeterol gives a response similar to epinephrine alone. These data indicate that when both nanobody and ligand are present, the intracellular receptor conformation is mainly imposed by the former and not the latter.
